# Supplementary material for: Exploring patient preferences for intraocular lenses selection in age-related cataract: a discrete choice experiment study
Source: Frontiers journal article supplement (doi:10.3389/fmed.2025.1446715), 2025-02-12
Supplement: Data_Sheet_1.pdf [file Data_Sheet_1.pdf]

# BLOCK ONE

Please compare the IOL offered, and tick which IOL you would choose

|                                         | OPTION A                                                                                           | OPTION B                                                                                        |
|-----------------------------------------|----------------------------------------------------------------------------------------------------|-------------------------------------------------------------------------------------------------|
| Blue-blocking                           | YES<br>Blue light (with potential harm to the retina) is blocked                                   | NO<br>Blue light (with potential harm to the retina) is not blocked                             |
| Spherical aberration correction         | NO<br>Spherical aberration, causing distortion in peripheral vision, is not corrected              | YES<br>Spherical aberration, causing distortion in peripheral vision, is corrected              |
| Astigmatism correction                  | NO<br>Astigmatism (resulting in clarity on certain axes and blurriness on others) is not corrected | YES<br>Astigmatism (resulting in clarity on certain axes and blurriness on others) is corrected |
| Presbyopia correction                   | 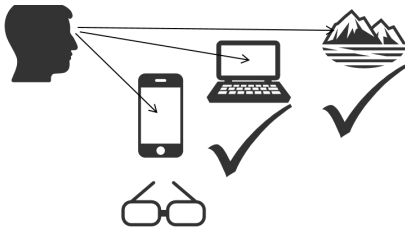                 |              |
| Probability of adverse visual phenomena | Risk of undesired visual effects (such as halos, glare, and starbursts)<br>10%                     | Risk of undesired visual effects (such as halos, glare, and starbursts)<br>20%                  |
| Recommendation from surgeon             | WITH                                                                                               | WITHOUT                                                                                         |
| Cost                                    | CNY ¥ 6000                                                                                         | CNY ¥ 10000                                                                                     |
|                                         |                                                                                                    |                                                                                                 |

|                                         | OPTION A                                                                                        | OPTION B                                                                                           |
|-----------------------------------------|-------------------------------------------------------------------------------------------------|----------------------------------------------------------------------------------------------------|
| Blue-blocking                           | YES<br>Blue light (with potential harm to the retina) is blocked                                | NO<br>Blue light (with potential harm to the retina) is not blocked                                |
| Spherical aberration correction         | YES<br>Spherical aberration, causing distortion in peripheral vision, is corrected              | NO<br>Spherical aberration, causing distortion in peripheral vision, is not corrected              |
| Astigmatism correction                  | YES<br>Astigmatism (resulting in clarity on certain axes and blurriness on others) is corrected | NO<br>Astigmatism (resulting in clarity on certain axes and blurriness on others) is not corrected |
| Presbyopia correction                   | 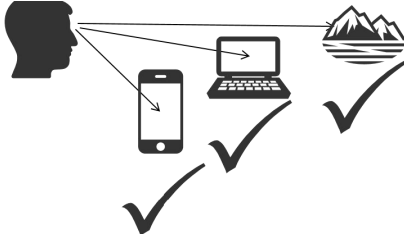               |                  |
| Probability of adverse visual phenomena | Risk of undesired visual effects (such as halos, glare, and starbursts)<br>0%                   | Risk of undesired visual effects (such as halos, glare, and starbursts)<br>10%                     |
| Recommendation from surgeon             | WITH                                                                                            | WITHOUT                                                                                            |
| Cost                                    | CNY ¥ 30000                                                                                     | CNY ¥ 10000                                                                                        |
|                                         |                                                                                                 |                                                                                                    |

|                                         | OPTION A                                                                                        | OPTION B                                                                                           |
|-----------------------------------------|-------------------------------------------------------------------------------------------------|----------------------------------------------------------------------------------------------------|
| Blue-blocking                           | NO<br>Blue light (with potential harm to the retina) is not blocked                             | YES<br>Blue light (with potential harm to the retina) is blocked                                   |
| Spherical aberration correction         | YES<br>Spherical aberration, causing distortion in peripheral vision, is corrected              | NO<br>Spherical aberration, causing distortion in peripheral vision, is not corrected              |
| Astigmatism correction                  | YES<br>Astigmatism (resulting in clarity on certain axes and blurriness on others) is corrected | NO<br>Astigmatism (resulting in clarity on certain axes and blurriness on others) is not corrected |
| Presbyopia correction                   | 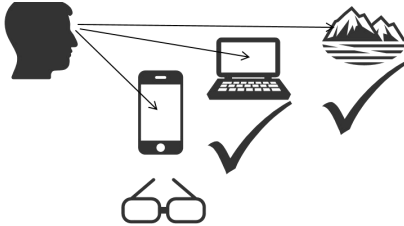               |                 |
| Probability of adverse visual phenomena | Risk of undesired visual effects (such as halos, glare, and starbursts)<br>0%                   | Risk of undesired visual effects (such as halos, glare, and starbursts)<br>20%                     |
| Recommendation from surgeon             | WITHOUT                                                                                         | WITH                                                                                               |
| Cost                                    | CNY ¥ 6000                                                                                      | CNY ¥ 3000                                                                                         |
|                                         |                                                                                                 |                                                                                                    |

|                                         | OPTION A                                                                                           | OPTION B                                                                                        |
|-----------------------------------------|----------------------------------------------------------------------------------------------------|-------------------------------------------------------------------------------------------------|
| Blue-blocking                           | NO<br>Blue light (with potential harm to the retina) is not blocked                                | YES<br>Blue light (with potential harm to the retina) is blocked                                |
| Spherical aberration correction         | YES<br>Spherical aberration, causing distortion in peripheral vision, is corrected                 | NO<br>Spherical aberration, causing distortion in peripheral vision, is not corrected           |
| Astigmatism correction                  | NO<br>Astigmatism (resulting in clarity on certain axes and blurriness on others) is not corrected | YES<br>Astigmatism (resulting in clarity on certain axes and blurriness on others) is corrected |
| Presbyopia correction                   | 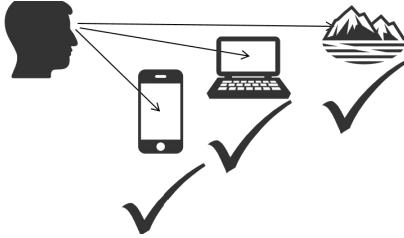                  |               |
| Probability of adverse visual phenomena | Risk of undesired visual effects (such as halos, glare, and starbursts)<br>40%                     | Risk of undesired visual effects (such as halos, glare, and starbursts)<br>0%                   |
| Recommendation from surgeon             | WITH                                                                                               | WITHOUT                                                                                         |
| Cost                                    | CNY ¥ 10000                                                                                        | CNY ¥ 3000                                                                                      |
|                                         |                                                                                                    |                                                                                                 |

Repeated task

|                                         | OPTION A                                                                                           | OPTION B                                                                                        |
|-----------------------------------------|----------------------------------------------------------------------------------------------------|-------------------------------------------------------------------------------------------------|
| Blue-blocking                           | YES<br>Blue light (with potential harm to the retina) is blocked                                   | NO<br>Blue light (with potential harm to the retina) is not blocked                             |
| Spherical aberration correction         | NO<br>Spherical aberration, causing distortion in peripheral vision, is not corrected              | YES<br>Spherical aberration, causing distortion in peripheral vision, is corrected              |
| Astigmatism correction                  | NO<br>Astigmatism (resulting in clarity on certain axes and blurriness on others) is not corrected | YES<br>Astigmatism (resulting in clarity on certain axes and blurriness on others) is corrected |
| Presbyopia correction                   | 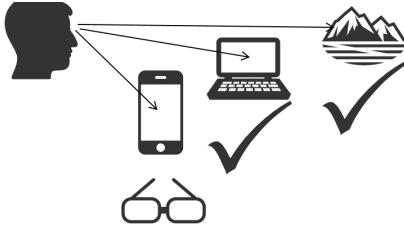                 |              |
| Probability of adverse visual phenomena | Risk of undesired visual effects (such as halos, glare, and starbursts)<br>10%                     | Risk of undesired visual effects (such as halos, glare, and starbursts)<br>20%                  |
| Recommendation from surgeon             | WITH                                                                                               | WITHOUT                                                                                         |
| Cost                                    | CNY ¥ 6000                                                                                         | CNY ¥ 10000                                                                                     |
|                                         |                                                                                                    |                                                                                                 |

|                                         | OPTION A                                                                                           | OPTION B                                                                                        |
|-----------------------------------------|----------------------------------------------------------------------------------------------------|-------------------------------------------------------------------------------------------------|
| Blue-blocking                           | YES<br>Blue light (with potential harm to the retina) is blocked                                   | NO<br>Blue light (with potential harm to the retina) is not blocked                             |
| Spherical aberration correction         | NO<br>Spherical aberration, causing distortion in peripheral vision, is not corrected              | YES<br>Spherical aberration, causing distortion in peripheral vision, is corrected              |
| Astigmatism correction                  | NO<br>Astigmatism (resulting in clarity on certain axes and blurriness on others) is not corrected | YES<br>Astigmatism (resulting in clarity on certain axes and blurriness on others) is corrected |
| Presbyopia correction                   | 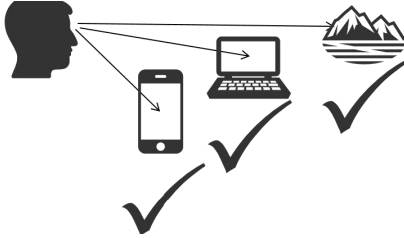                  |               |
| Probability of adverse visual phenomena | Risk of undesired visual effects (such as halos, glare, and starbursts)<br>0%                      | Risk of undesired visual effects (such as halos, glare, and starbursts)<br>20%                  |
| Recommendation from surgeon             | WITHOUT                                                                                            | WITH                                                                                            |
| Cost                                    | CNY ¥ 10000                                                                                        | CNY ¥ 3000                                                                                      |
|                                         |                                                                                                    |                                                                                                 |

|                                         | OPTION A                                                                                           | OPTION B                                                                                        |
|-----------------------------------------|----------------------------------------------------------------------------------------------------|-------------------------------------------------------------------------------------------------|
| Blue-blocking                           | NO<br>Blue light (with potential harm to the retina) is not blocked                                | YES<br>Blue light (with potential harm to the retina) is blocked                                |
| Spherical aberration correction         | YES<br>Spherical aberration, causing distortion in peripheral vision, is corrected                 | NO<br>Spherical aberration, causing distortion in peripheral vision, is not corrected           |
| Astigmatism correction                  | NO<br>Astigmatism (resulting in clarity on certain axes and blurriness on others) is not corrected | YES<br>Astigmatism (resulting in clarity on certain axes and blurriness on others) is corrected |
| Presbyopia correction                   | 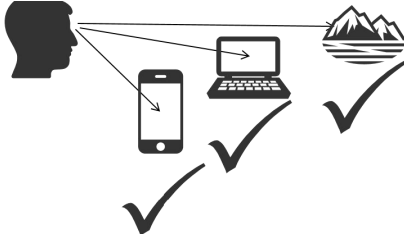                  |               |
| Probability of adverse visual phenomena | Risk of undesired visual effects (such as halos, glare, and starbursts)<br>30%                     | Risk of undesired visual effects (such as halos, glare, and starbursts)<br>40%                  |
| Recommendation from surgeon             | WITH                                                                                               | WITHOUT                                                                                         |
| Cost                                    | CNY ¥ 6000                                                                                         | CNY ¥ 2000                                                                                      |
|                                         |                                                                                                    |                                                                                                 |

|                                         | OPTION A                                                                                        | OPTION B                                                                                           |
|-----------------------------------------|-------------------------------------------------------------------------------------------------|----------------------------------------------------------------------------------------------------|
| Blue-blocking                           | YES<br>Blue light (with potential harm to the retina) is blocked                                | NO<br>Blue light (with potential harm to the retina) is not blocked                                |
| Spherical aberration correction         | NO<br>Spherical aberration, causing distortion in peripheral vision, is not corrected           | YES<br>Spherical aberration, causing distortion in peripheral vision, is corrected                 |
| Astigmatism correction                  | YES<br>Astigmatism (resulting in clarity on certain axes and blurriness on others) is corrected | NO<br>Astigmatism (resulting in clarity on certain axes and blurriness on others) is not corrected |
| Presbyopia correction                   | 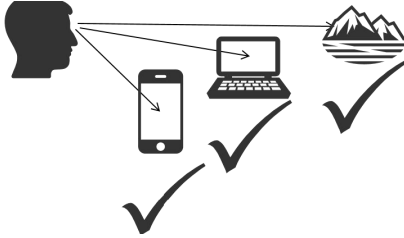               |                  |
| Probability of adverse visual phenomena | Risk of undesired visual effects (such as halos, glare, and starbursts)<br>20%                  | Risk of undesired visual effects (such as halos, glare, and starbursts)<br>0%                      |
| Recommendation from surgeon             | WITHOUT                                                                                         | WITH                                                                                               |
| Cost                                    | CNY ¥ 6000                                                                                      | CNY ¥ 3000                                                                                         |
|                                         |                                                                                                 |                                                                                                    |



|                                         | OPTION A                                                                                        | OPTION B                                                                                           |
|-----------------------------------------|-------------------------------------------------------------------------------------------------|----------------------------------------------------------------------------------------------------|
| Blue-blocking                           | NO<br>Blue light (with potential harm to the retina) is not blocked                             | YES<br>Blue light (with potential harm to the retina) is blocked                                   |
| Spherical aberration correction         | NO<br>Spherical aberration, causing distortion in peripheral vision, is not corrected           | YES<br>Spherical aberration, causing distortion in peripheral vision, is corrected                 |
| Astigmatism correction                  | YES<br>Astigmatism (resulting in clarity on certain axes and blurriness on others) is corrected | NO<br>Astigmatism (resulting in clarity on certain axes and blurriness on others) is not corrected |
| Presbyopia correction                   | 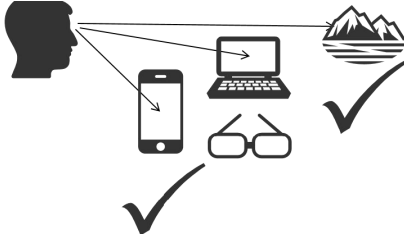               |                 |
| Probability of adverse visual phenomena | Risk of undesired visual effects (such as halos, glare, and starbursts)<br>0%                   | Risk of undesired visual effects (such as halos, glare, and starbursts)<br>30%                     |
| Recommendation from surgeon             | WITH                                                                                            | WITHOUT                                                                                            |
| Cost                                    | CNY ¥ 6000                                                                                      | CNY ¥ 2000                                                                                         |
|                                         |                                                                                                 |                                                                                                    |

# Dominance task

|                                         | OPTION A                                                                                           | OPTION B                                                                                        |
|-----------------------------------------|----------------------------------------------------------------------------------------------------|-------------------------------------------------------------------------------------------------|
| Blue-blocking                           | NO<br>Blue light (with potential harm to the retina) is not blocked                                | YES<br>Blue light (with potential harm to the retina) is blocked                                |
| Spherical aberration correction         | NO<br>Spherical aberration, causing distortion in peripheral vision, is not corrected              | YES<br>Spherical aberration, causing distortion in peripheral vision, is corrected              |
| Astigmatism correction                  | NO<br>Astigmatism (resulting in clarity on certain axes and blurriness on others) is not corrected | YES<br>Astigmatism (resulting in clarity on certain axes and blurriness on others) is corrected |
| Presbyopia correction                   | 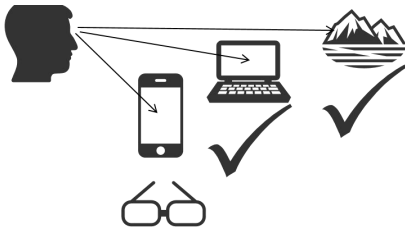                 |              |
| Probability of adverse visual phenomena | Risk of undesired visual effects (such as halos, glare, and starbursts)<br>40%                     | Risk of undesired visual effects (such as halos, glare, and starbursts)<br>0%                   |
| Recommendation from surgeon             | WITHOUT                                                                                            | WITH                                                                                            |
| Cost                                    | CNY ¥ 30000                                                                                        | CNY ¥ 2000                                                                                      |
|                                         |                                                                                                    |                                                                                                 |

BLOCK TWO

Please compare the IOL offered, and tick which IOL you would choose

|                                         | OPTION A                                                                                           | OPTION B                                                                                        |
|-----------------------------------------|----------------------------------------------------------------------------------------------------|-------------------------------------------------------------------------------------------------|
| Blue-blocking                           | YES<br>Blue light (with potential harm to the retina) is blocked                                   | NO<br>Blue light (with potential harm to the retina) is not blocked                             |
| Spherical aberration correction         | YES<br>Spherical aberration, causing distortion in peripheral vision, is corrected                 | NO<br>Spherical aberration, causing distortion in peripheral vision, is not corrected           |
| Astigmatism correction                  | NO<br>Astigmatism (resulting in clarity on certain axes and blurriness on others) is not corrected | YES<br>Astigmatism (resulting in clarity on certain axes and blurriness on others) is corrected |
| Presbyopia correction                   | 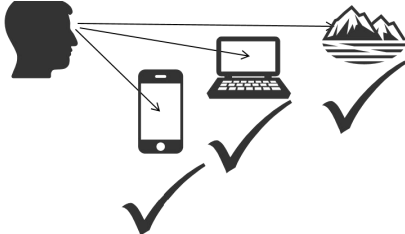                 |              |
| Probability of adverse visual phenomena | Risk of undesired visual effects (such as halos, glare, and starbursts)<br>10%                     | Risk of undesired visual effects (such as halos, glare, and starbursts)<br>30%                  |
| Recommendation from surgeon             | WITHOUT                                                                                            | WITH                                                                                            |
| Cost                                    | CNY ¥ 3000                                                                                         | CNY ¥ 2000                                                                                      |
|                                         |                                                                                                    |                                                                                                 |

|                                         | OPTION A                                                                                        | OPTION B                                                                                           |
|-----------------------------------------|-------------------------------------------------------------------------------------------------|----------------------------------------------------------------------------------------------------|
| Blue-blocking                           | YES<br>Blue light (with potential harm to the retina) is blocked                                | NO<br>Blue light (with potential harm to the retina) is not blocked                                |
| Spherical aberration correction         | YES<br>Spherical aberration, causing distortion in peripheral vision, is corrected              | NO<br>Spherical aberration, causing distortion in peripheral vision, is not corrected              |
| Astigmatism correction                  | YES<br>Astigmatism (resulting in clarity on certain axes and blurriness on others) is corrected | NO<br>Astigmatism (resulting in clarity on certain axes and blurriness on others) is not corrected |
| Presbyopia correction                   | 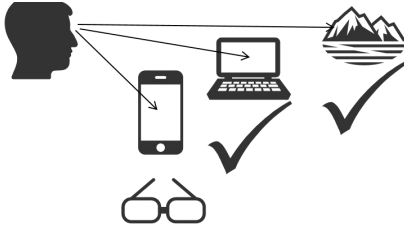               |                 |
| Probability of adverse visual phenomena | Risk of undesired visual effects (such as halos, glare, and starbursts)<br>30%                  | Risk of undesired visual effects (such as halos, glare, and starbursts)<br>20%                     |
| Recommendation from surgeon             | WITH                                                                                            | WITHOUT                                                                                            |
| Cost                                    | CNY ¥ 10000                                                                                     | CNY ¥ 30000                                                                                        |
|                                         |                                                                                                 |                                                                                                    |

|                                         | OPTION A                                                                                           | OPTION B                                                                                        |
|-----------------------------------------|----------------------------------------------------------------------------------------------------|-------------------------------------------------------------------------------------------------|
| Blue-blocking                           | NO<br>Blue light (with potential harm to the retina) is not blocked                                | YES<br>Blue light (with potential harm to the retina) is blocked                                |
| Spherical aberration correction         | YES<br>Spherical aberration, causing distortion in peripheral vision, is corrected                 | NO<br>Spherical aberration, causing distortion in peripheral vision, is not corrected           |
| Astigmatism correction                  | NO<br>Astigmatism (resulting in clarity on certain axes and blurriness on others) is not corrected | YES<br>Astigmatism (resulting in clarity on certain axes and blurriness on others) is corrected |
| Presbyopia correction                   | 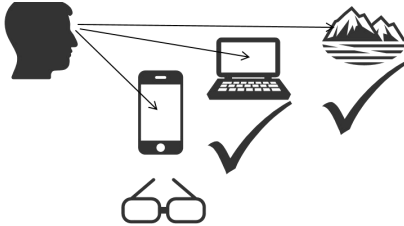                  |              |
| Probability of adverse visual phenomena | Risk of undesired visual effects (such as halos, glare, and starbursts)<br>20%                     | Risk of undesired visual effects (such as halos, glare, and starbursts)<br>40%                  |
| Recommendation from surgeon             | WITHOUT                                                                                            | WITH                                                                                            |
| Cost                                    | CNY ¥ 2000                                                                                         | CNY ¥ 3000                                                                                      |
|                                         |                                                                                                    |                                                                                                 |

|  | OPTION A | OPTION B |
|--|----------|----------|
|--|----------|----------|

|                                         |                                                                                                 |                                                                                                    |
|-----------------------------------------|-------------------------------------------------------------------------------------------------|----------------------------------------------------------------------------------------------------|
| Blue-blocking                           | NO<br>Blue light (with potential harm to the retina) is not blocked                             | YES<br>Blue light (with potential harm to the retina) is blocked                                   |
| Spherical aberration correction         | NO<br>Spherical aberration, causing distortion in peripheral vision, is not corrected           | YES<br>Spherical aberration, causing distortion in peripheral vision, is corrected                 |
| Astigmatism correction                  | YES<br>Astigmatism (resulting in clarity on certain axes and blurriness on others) is corrected | NO<br>Astigmatism (resulting in clarity on certain axes and blurriness on others) is not corrected |
| Presbyopia correction                   | 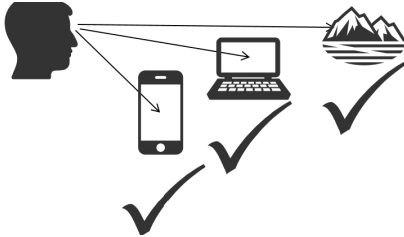               |                  |
| Probability of adverse visual phenomena | <br>10%       | <br>30%         |
| Recommendation from surgeon             | WITH                                                                                            | WITHOUT                                                                                            |
| Cost                                    | CNY ¥ 2000                                                                                      | CNY ¥ 6000                                                                                         |
|                                         |                                                                                                 |                                                                                                    |

Repeated task

|                                         | OPTION A                                                                                           | OPTION B                                                                                        |
|-----------------------------------------|----------------------------------------------------------------------------------------------------|-------------------------------------------------------------------------------------------------|
| Blue-blocking                           | YES<br>Blue light (with potential harm to the retina) is blocked                                   | NO<br>Blue light (with potential harm to the retina) is not blocked                             |
| Spherical aberration correction         | YES<br>Spherical aberration, causing distortion in peripheral vision, is corrected                 | NO<br>Spherical aberration, causing distortion in peripheral vision, is not corrected           |
| Astigmatism correction                  | NO<br>Astigmatism (resulting in clarity on certain axes and blurriness on others) is not corrected | YES<br>Astigmatism (resulting in clarity on certain axes and blurriness on others) is corrected |
| Presbyopia correction                   | 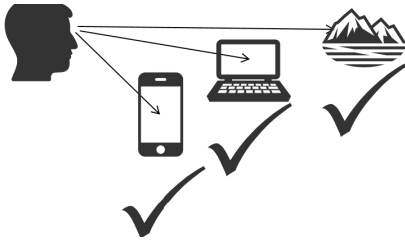                 |              |
| Probability of adverse visual phenomena | Risk of undesired visual effects (such as halos, glare, and starbursts)<br>10%                     | Risk of undesired visual effects (such as halos, glare, and starbursts)<br>30%                  |
| Recommendation from surgeon             | WITHOUT                                                                                            | WITH                                                                                            |
| Cost                                    | CNY ¥ 3000                                                                                         | CNY ¥ 2000                                                                                      |
|                                         |                                                                                                    |                                                                                                 |

|                                         | OPTION A                                                                                           | OPTION B                                                                                        |
|-----------------------------------------|----------------------------------------------------------------------------------------------------|-------------------------------------------------------------------------------------------------|
| Blue-blocking                           | YES<br>Blue light (with potential harm to the retina) is blocked                                   | NO<br>Blue light (with potential harm to the retina) is not blocked                             |
| Spherical aberration correction         | YES<br>Spherical aberration, causing distortion in peripheral vision, is corrected                 | NO<br>Spherical aberration, causing distortion in peripheral vision, is not corrected           |
| Astigmatism correction                  | NO<br>Astigmatism (resulting in clarity on certain axes and blurriness on others) is not corrected | YES<br>Astigmatism (resulting in clarity on certain axes and blurriness on others) is corrected |
| Presbyopia correction                   | 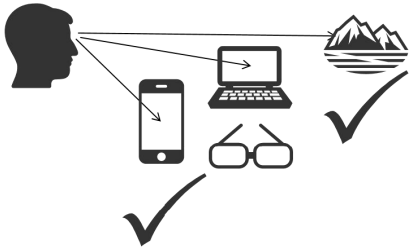                 |               |
| Probability of adverse visual phenomena | Risk of undesired visual effects (such as halos, glare, and starbursts)<br>10%                     | Risk of undesired visual effects (such as halos, glare, and starbursts)<br>30%                  |
| Recommendation from surgeon             | WITH                                                                                               | WITHOUT                                                                                         |
| Cost                                    | CNY ¥ 2000                                                                                         | CNY ¥ 3000                                                                                      |
|                                         |                                                                                                    |                                                                                                 |



|                                         | OPTION A                                                                                        | OPTION B                                                                                           |
|-----------------------------------------|-------------------------------------------------------------------------------------------------|----------------------------------------------------------------------------------------------------|
| Blue-blocking                           | NO<br>Blue light (with potential harm to the retina) is not blocked                             | YES<br>Blue light (with potential harm to the retina) is blocked                                   |
| Spherical aberration correction         | YES<br>Spherical aberration, causing distortion in peripheral vision, is corrected              | NO<br>Spherical aberration, causing distortion in peripheral vision, is not corrected              |
| Astigmatism correction                  | YES<br>Astigmatism (resulting in clarity on certain axes and blurriness on others) is corrected | NO<br>Astigmatism (resulting in clarity on certain axes and blurriness on others) is not corrected |
| Presbyopia correction                   | 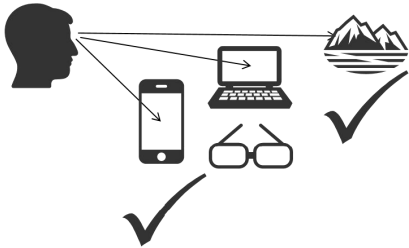              |                  |
| Probability of adverse visual phenomena | Risk of undesired visual effects (such as halos, glare, and starbursts)<br>10%                  | Risk of undesired visual effects (such as halos, glare, and starbursts)<br>20%                     |
| Recommendation from surgeon             | WITHOUT                                                                                         | WITH                                                                                               |
| Cost                                    | CNY ¥ 30000                                                                                     | CNY ¥ 10000                                                                                        |
|                                         |                                                                                                 |                                                                                                    |

|                                         | OPTION A                                                                                        | OPTION B                                                                                           |
|-----------------------------------------|-------------------------------------------------------------------------------------------------|----------------------------------------------------------------------------------------------------|
| Blue-blocking                           | YES<br>Blue light (with potential harm to the retina) is blocked                                | NO<br>Blue light (with potential harm to the retina) is not blocked                                |
| Spherical aberration correction         | NO<br>Spherical aberration, causing distortion in peripheral vision, is not corrected           | YES<br>Spherical aberration, causing distortion in peripheral vision, is corrected                 |
| Astigmatism correction                  | YES<br>Astigmatism (resulting in clarity on certain axes and blurriness on others) is corrected | NO<br>Astigmatism (resulting in clarity on certain axes and blurriness on others) is not corrected |
| Presbyopia correction                   | 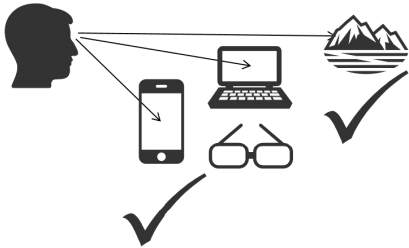              |                  |
| Probability of adverse visual phenomena | Risk of undesired visual effects (such as halos, glare, and starbursts)<br>10%                  | Risk of undesired visual effects (such as halos, glare, and starbursts)<br>40%                     |
| Recommendation from surgeon             | WITH                                                                                            | WITHOUT                                                                                            |
| Cost                                    | CNY ¥ 10000                                                                                     | CNY ¥ 6000                                                                                         |
|                                         |                                                                                                 |                                                                                                    |

|                                         | OPTION A                                                                                        | OPTION B                                                                                           |
|-----------------------------------------|-------------------------------------------------------------------------------------------------|----------------------------------------------------------------------------------------------------|
| Blue-blocking                           | YES<br>Blue light (with potential harm to the retina) is blocked                                | NO<br>Blue light (with potential harm to the retina) is not blocked                                |
| Spherical aberration correction         | YES<br>Spherical aberration, causing distortion in peripheral vision, is corrected              | NO<br>Spherical aberration, causing distortion in peripheral vision, is not corrected              |
| Astigmatism correction                  | YES<br>Astigmatism (resulting in clarity on certain axes and blurriness on others) is corrected | NO<br>Astigmatism (resulting in clarity on certain axes and blurriness on others) is not corrected |
| Presbyopia correction                   | 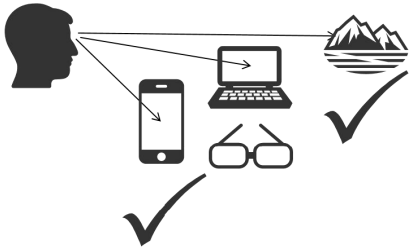              |                  |
| Probability of adverse visual phenomena | Risk of undesired visual effects (such as halos, glare, and starbursts)<br>20%                  | Risk of undesired visual effects (such as halos, glare, and starbursts)<br>30%                     |
| Recommendation from surgeon             | WITHOUT                                                                                         | WITH                                                                                               |
| Cost                                    | CNY ¥ 10000                                                                                     | CNY ¥ 30000                                                                                        |
|                                         |                                                                                                 |                                                                                                    |

# Dominance task

|                                         | OPTION A                                                                                           | OPTION B                                                                                        |
|-----------------------------------------|----------------------------------------------------------------------------------------------------|-------------------------------------------------------------------------------------------------|
| Blue-blocking                           | NO<br>Blue light (with potential harm to the retina) is not blocked                                | YES<br>Blue light (with potential harm to the retina) is blocked                                |
| Spherical aberration correction         | NO<br>Spherical aberration, causing distortion in peripheral vision, is not corrected              | YES<br>Spherical aberration, causing distortion in peripheral vision, is corrected              |
| Astigmatism correction                  | NO<br>Astigmatism (resulting in clarity on certain axes and blurriness on others) is not corrected | YES<br>Astigmatism (resulting in clarity on certain axes and blurriness on others) is corrected |
| Presbyopia correction                   |                  |              |
| Probability of adverse visual phenomena | Risk of undesired visual effects (such as halos, glare, and starbursts)<br>40%                     | Risk of undesired visual effects (such as halos, glare, and starbursts)<br>0%                   |
| Recommendation from surgeon             | WITHOUT                                                                                            | WITH                                                                                            |
| Cost                                    | CNY ¥ 30000                                                                                        | CNY ¥ 2000                                                                                      |
|                                         |                                                                                                    |                                                                                                 |
